# Supplementary material for: Novel Serum and Urinary Metabolites Associated with Diabetic Retinopathy in Three Asian Cohorts
Source: MDPI journal article supplement (doi:10.3390/metabo11090614), 2021-09-09
Supplement: s1 [file s1]

## SUPPLEMENTARY MATERIAL

**Table S1.** Serum/plasma metabolites associated with any DR.

| Category of metabolites   | Name of metabolytes                                     | Chinese |             | Malay |             | Indian |             | Pooled |             |           | After Bonferroni Correction |
|---------------------------|---------------------------------------------------------|---------|-------------|-------|-------------|--------|-------------|--------|-------------|-----------|-----------------------------|
|                           |                                                         | OR      | 95%CI       | OR    | 95%CI       | OR     | 95%CI       | OR     | 95%CI       | P - value |                             |
| Ketone bodies             | 3-hydroxybutyrate                                       | 1.51    | 1.14 - 2.01 | 1.16  | 0.95 - 1.41 | 1.26   | 1.07 - 1.48 | 1.26   | 1.13 - 1.41 | 0.00007   | select                      |
| Fluid Balance             | Creatinine                                              | 1.45    | 1.09 - 1.95 | 1.50  | 1.18 - 1.9  | 1.40   | 1.17 - 1.67 | 1.44   | 1.26 - 1.63 | 0.00000   | select                      |
| Fatty acids (%)           | Ratio of 22:6 docosahexaenoic acid to total fatty acids | 1.02    | 0.79 - 1.31 | 1.11  | 0.92 - 1.34 | 1.26   | 1.08 - 1.48 | 1.16   | 1.04 - 1.29 | 0.00827   |                             |
| Cholesterol               | Esterified cholesterol                                  | 0.88    | 0.68 - 1.14 | 0.71  | 0.59 - 0.87 | 0.97   | 0.84 - 1.13 | 0.87   | 0.78 - 0.97 | 0.01294   |                             |
| Fatty acids by saturation | Omega-6 fatty acids                                     | 0.80    | 0.61 - 1.05 | 0.77  | 0.63 - 0.93 | 0.99   | 0.86 - 1.16 | 0.88   | 0.79 - 0.99 | 0.02747   |                             |
| Lipoprotein subclasses    | & Total cholesterol in IDL                              | 0.84    | 0.64 - 1.10 | 0.74  | 0.60 - 0.90 | 0.95   | 0.82 - 1.1  | 0.86   | 0.77 - 0.96 | 0.00921   |                             |
| Cholesterol               |                                                         |         |             |       |             |        |             |        |             |           |                             |
| Lipoprotein subclasses    | Total cholesterol to total lipids ratio in IDL          | 0.87    | 0.68 - 1.12 | 0.70  | 0.56 - 0.87 | 0.87   | 0.74 - 1.01 | 0.82   | 0.73 - 0.92 | 0.00056   | select                      |
| Lipoprotein subclasses    | Cholesterol esters in IDL                               | 0.85    | 0.65 - 1.09 | 0.72  | 0.59 - 0.88 | 0.96   | 0.83 - 1.11 | 0.86   | 0.78 - 0.96 | 0.00839   |                             |
| Lipoprotein subclasses    | Cholesterol esters to total lipids ratio in IDL         | 0.75    | 0.58 - 0.98 | 0.69  | 0.56 - 0.86 | 0.86   | 0.74 - 1.01 | 0.79   | 0.71 - 0.89 | 0.00007   | select                      |
| Lipoprotein subclasses    | Free cholesterol in IDL                                 | 0.95    | 0.72 - 1.25 | 0.78  | 0.64 - 0.95 | 0.95   | 0.82 - 1.11 | 0.90   | 0.80 - 1.00 | 0.05121   |                             |
| Lipoprotein subclasses    | Total lipids in IDL                                     | 0.88    | 0.68 - 1.14 | 0.75  | 0.62 - 0.91 | 0.97   | 0.83 - 1.12 | 0.88   | 0.79 - 0.98 | 0.01879   |                             |
| Lipoprotein subclasses    | Concentration of IDL particles                          | 0.87    | 0.67 - 1.12 | 0.78  | 0.65 - 0.95 | 0.97   | 0.83 - 1.13 | 0.89   | 0.80 - 0.99 | 0.03083   |                             |

|                        |                                                       |      |             |      |             |      |             |      |             |         |
|------------------------|-------------------------------------------------------|------|-------------|------|-------------|------|-------------|------|-------------|---------|
| Lipoprotein subclasses | Phospholipids in IDL                                  | 0.91 | 0.71 - 1.17 | 0.75 | 0.62 - 0.91 | 0.97 | 0.84 - 1.13 | 0.89 | 0.80 - 0.99 | 0.02956 |
| Lipoprotein subclasses | Triglycerides to total lipids ratio in IDL            | 1.07 | 0.84 - 1.37 | 1.33 | 1.10 - 1.61 | 1.13 | 0.98 - 1.30 | 1.18 | 1.06 - 1.30 | 0.00204 |
| Fatty acids            | 18:2, linoleic acid                                   | 0.82 | 0.63 - 1.07 | 0.77 | 0.63 - 0.93 | 0.99 | 0.85 - 1.16 | 0.88 | 0.79 - 0.99 | 0.02714 |
| Cholesterol            | Total cholesterol in LDL                              | 0.88 | 0.67 - 1.16 | 0.71 | 0.58 - 0.87 | 0.97 | 0.84 - 1.13 | 0.87 | 0.78 - 0.97 | 0.01522 |
| Lipoprotein subclasses | Free cholesterol to total lipids ratio in large HDL   | 1.12 | 0.83 - 1.52 | 1.28 | 1.01 - 1.62 | 1.04 | 0.87 - 1.24 | 1.12 | 0.99 - 1.28 | 0.08041 |
| Lipoprotein subclasses | Total cholesterol in large LDL                        | 0.86 | 0.65 - 1.13 | 0.71 | 0.57 - 0.87 | 0.96 | 0.83 - 1.12 | 0.87 | 0.78 - 0.97 | 0.01123 |
| Lipoprotein subclasses | Total cholesterol to total lipids ratio in large LDL  | 0.88 | 0.61 - 1.29 | 0.68 | 0.54 - 0.86 | 0.95 | 0.81 - 1.11 | 0.86 | 0.76 - 0.97 | 0.01790 |
| Lipoprotein subclasses | Cholesterol esters in large LDL                       | 0.85 | 0.65 - 1.11 | 0.69 | 0.56 - 0.86 | 0.97 | 0.83 - 1.12 | 0.86 | 0.77 - 0.97 | 0.01115 |
| Lipoprotein subclasses | Cholesterol esters to total lipids ratio in large LDL | 0.79 | 0.58 - 1.08 | 0.62 | 0.48 - 0.80 | 0.95 | 0.81 - 1.12 | 0.83 | 0.73 - 0.94 | 0.00401 |
| Lipoprotein subclasses | Free cholesterol in large LDL                         | 0.91 | 0.68 - 1.22 | 0.75 | 0.62 - 0.91 | 0.96 | 0.83 - 1.11 | 0.88 | 0.79 - 0.98 | 0.02488 |
| Lipoprotein subclasses | Total lipids in large LDL                             | 0.86 | 0.66 - 1.12 | 0.72 | 0.59 - 0.88 | 0.98 | 0.84 - 1.13 | 0.88 | 0.78 - 0.98 | 0.01600 |
| Lipoprotein subclasses | Concentration of large LDL particles                  | 0.88 | 0.68 - 1.14 | 0.72 | 0.59 - 0.88 | 0.98 | 0.84 - 1.14 | 0.88 | 0.79 - 0.98 | 0.02035 |
| Lipoprotein subclasses | Phospholipids in large LDL                            | 0.87 | 0.67 - 1.13 | 0.75 | 0.61 - 0.90 | 0.97 | 0.83 - 1.12 | 0.88 | 0.79 - 0.97 | 0.01515 |
| Lipoprotein subclasses | Phospholipids to total lipids ratio in large LDL      | 1.11 | 0.83 - 1.47 | 1.29 | 1.05 - 1.58 | 1.00 | 0.86 - 1.17 | 1.10 | 0.98 - 1.23 | 0.10656 |
| Lipoprotein subclasses | Triglycerides to total lipids ratio in large LDL      | 1.05 | 0.80 - 1.37 | 1.34 | 1.11 - 1.62 | 1.10 | 0.94 - 1.27 | 1.16 | 1.04 - 1.29 | 0.00705 |

|                              |                                                                         |      |             |      |             |      |             |      |             |         |
|------------------------------|-------------------------------------------------------------------------|------|-------------|------|-------------|------|-------------|------|-------------|---------|
| Lipoprotein subclasses       | Cholesterol esters to total lipids ratio in chylomicrons and large VLDL | 1.14 | 0.85 - 1.51 | 1.29 | 1.05 - 1.58 | 1.06 | 0.91 - 1.23 | 1.14 | 1.02 - 1.27 | 0.02421 |
| Lipoprotein subclasses       | Total cholesterol in medium LDL                                         | 0.93 | 0.72 - 1.20 | 0.71 | 0.59 - 0.87 | 1.00 | 0.86 - 1.15 | 0.89 | 0.80 - 0.99 | 0.03888 |
| Lipoprotein subclasses       | Cholesterol esters in medium LDL                                        | 0.90 | 0.68 - 1.19 | 0.71 | 0.57 - 0.88 | 0.98 | 0.83 - 1.16 | 0.88 | 0.78 - 0.99 | 0.03447 |
| Lipoprotein subclasses       | Cholesterol esters to total lipids ratio in medium LDL                  | 0.93 | 0.71 - 1.21 | 0.74 | 0.58 - 0.94 | 0.99 | 0.84 - 1.18 | 0.90 | 0.80 - 1.02 | 0.11005 |
| Lipoprotein subclasses       | Free cholesterol in medium LDL                                          | 0.89 | 0.69 - 1.16 | 0.76 | 0.63 - 0.91 | 0.97 | 0.84 - 1.12 | 0.88 | 0.80 - 0.98 | 0.02282 |
| Lipoprotein subclasses       | Total lipids in medium LDL                                              | 0.89 | 0.69 - 1.16 | 0.71 | 0.59 - 0.87 | 0.99 | 0.86 - 1.15 | 0.88 | 0.79 - 0.98 | 0.02378 |
| Lipoprotein subclasses       | Concentration of medium LDL particles                                   | 0.89 | 0.69 - 1.15 | 0.78 | 0.65 - 0.94 | 1.00 | 0.86 - 1.15 | 0.90 | 0.81 - 1.00 | 0.05714 |
| Lipoprotein subclasses       | Phospholipids in medium LDL                                             | 0.81 | 0.62 - 1.06 | 0.74 | 0.61 - 0.90 | 0.98 | 0.84 - 1.13 | 0.87 | 0.78 - 0.97 | 0.01047 |
| Lipoprotein subclasses       | Triglycerides to total lipids ratio in medium LDL                       | 1.06 | 0.82 - 1.37 | 1.33 | 1.11 - 1.60 | 1.08 | 0.93 - 1.24 | 1.15 | 1.04 - 1.27 | 0.00860 |
| Glycerides and phospholipids | Phosphatidylcholine and other cholines                                  | 0.84 | 0.65 - 1.08 | 0.79 | 0.65 - 0.96 | 0.98 | 0.85 - 1.14 | 0.90 | 0.80 - 1.00 | 0.04394 |
| Cholesterol                  | Serum total cholesterol                                                 | 0.86 | 0.67 - 1.11 | 0.76 | 0.62 - 0.92 | 0.98 | 0.85 - 1.14 | 0.89 | 0.80 - 0.99 | 0.02697 |
| Fatty acids by saturation    | Saturated fatty acids                                                   | 0.76 | 0.58 - 1.00 | 0.78 | 0.65 - 0.95 | 0.99 | 0.85 - 1.15 | 0.88 | 0.79 - 0.98 | 0.02238 |
| Lipoprotein subclasses       | Total cholesterol in small LDL                                          | 0.95 | 0.74 - 1.23 | 0.72 | 0.59 - 0.87 | 1.00 | 0.86 - 1.15 | 0.90 | 0.81 - 1.00 | 0.04639 |
| Lipoprotein subclasses       | Cholesterol esters in small LDL                                         | 0.91 | 0.67 - 1.24 | 0.73 | 0.59 - 0.90 | 0.97 | 0.82 - 1.15 | 0.88 | 0.78 - 0.99 | 0.03090 |
| Lipoprotein subclasses       | Free cholesterol in small LDL                                           | 0.92 | 0.71 - 1.18 | 0.68 | 0.55 - 0.85 | 0.97 | 0.84 - 1.13 | 0.88 | 0.79 - 0.98 | 0.02148 |

|                              |                                                                              |      |             |      |             |      |             |      |             |         |        |
|------------------------------|------------------------------------------------------------------------------|------|-------------|------|-------------|------|-------------|------|-------------|---------|--------|
| Lipoprotein subclasses       | Total lipids in small LDL                                                    | 0.89 | 0.69 - 1.15 | 0.78 | 0.65 - 0.93 | 0.98 | 0.85 - 1.14 | 0.90 | 0.81 - 1.00 | 0.04046 |        |
| Lipoprotein subclasses       | Concentration of small LDL particles                                         | 0.88 | 0.68 - 1.14 | 0.78 | 0.65 - 0.93 | 0.98 | 0.85 - 1.14 | 0.89 | 0.81 - 0.99 | 0.03836 |        |
| Lipoprotein subclasses       | Phospholipids in small LDL                                                   | 0.82 | 0.63 - 1.06 | 0.65 | 0.53 - 0.81 | 0.95 | 0.82 - 1.11 | 0.84 | 0.75 - 0.94 | 0.00219 |        |
| Glycerides and phospholipids | Sphingomyelins                                                               | 0.86 | 0.67 - 1.11 | 0.76 | 0.63 - 0.92 | 0.93 | 0.80 - 1.09 | 0.86 | 0.77 - 0.96 | 0.00782 |        |
| Glycerides and phospholipids | Total cholines                                                               | 0.84 | 0.65 - 1.08 | 0.81 | 0.66 - 0.98 | 0.99 | 0.85 - 1.15 | 0.90 | 0.81 - 1.01 | 0.06736 |        |
| Glycerides and phospholipids | Total phosphoglycerides                                                      | 0.81 | 0.62 - 1.05 | 0.77 | 0.63 - 0.94 | 1.00 | 0.86 - 1.16 | 0.89 | 0.80 - 0.99 | 0.03292 |        |
| Aromatic amino acids         | Tyrosine                                                                     | 0.70 | 0.54 - 0.91 | 0.72 | 0.59 - 0.87 | 0.73 | 0.63 - 0.85 | 0.72 | 0.65 - 0.81 | 0.00000 | select |
| Lipoprotein subclasses       | Total cholesterol in very large HDL                                          | 0.85 | 0.67 - 1.08 | 0.97 | 0.79 - 1.20 | 0.85 | 0.74 - 0.98 | 0.88 | 0.79 - 0.98 | 0.01618 |        |
| Lipoprotein subclasses       | Cholesterol esters in very large HDL                                         | 0.85 | 0.67 - 1.07 | 0.95 | 0.76 - 1.18 | 0.85 | 0.74 - 0.97 | 0.87 | 0.78 - 0.97 | 0.00937 |        |
| Lipoprotein subclasses       | Triglycerides in very large HDL                                              | 0.81 | 0.64 - 1.02 | 0.92 | 0.71 - 1.19 | 0.86 | 0.75 - 0.99 | 0.86 | 0.77 - 0.96 | 0.00546 |        |
| Lipoprotein subclasses       | Cholesterol esters to total lipids ratio in chylomicrons and very large VLDL | 1.21 | 0.85 - 1.72 | 1.42 | 1.13 - 1.77 | 1.04 | 0.84 - 1.28 | 1.20 | 1.04 - 1.38 | 0.01041 |        |
| Lipoprotein subclasses       | Total lipids in very large VLDL                                              | 0.83 | 0.65 - 1.05 | 0.79 | 0.64 - 0.97 | 0.99 | 0.85 - 1.15 | 0.90 | 0.81 - 1.00 | 0.05325 |        |
| Lipoprotein subclasses       | Concentration of very large VLDL particles                                   | 0.83 | 0.65 - 1.05 | 0.78 | 0.63 - 0.97 | 0.99 | 0.86 - 1.16 | 0.90 | 0.81 - 1.00 | 0.05364 |        |
| Lipoprotein subclasses       | Phospholipids in very large VLDL                                             | 0.84 | 0.66 - 1.06 | 0.77 | 0.62 - 0.96 | 1.00 | 0.86 - 1.16 | 0.90 | 0.81 - 1.00 | 0.05576 |        |

|                        |                                                                                   |      |             |      |             |      |             |      |             |         |
|------------------------|-----------------------------------------------------------------------------------|------|-------------|------|-------------|------|-------------|------|-------------|---------|
| Lipoprotein subclasses | Triglycerides in very large VLDL                                                  | 0.83 | 0.65 - 1.05 | 0.79 | 0.63 - 0.99 | 0.98 | 0.84 - 1.13 | 0.90 | 0.80 - 1.00 | 0.04821 |
| Lipoprotein subclasses | Cholesterol esters in very small VLDL                                             | 0.83 | 0.64 - 1.07 | 0.79 | 0.63 - 0.98 | 0.96 | 0.82 - 1.12 | 0.89 | 0.79 - 0.99 | 0.03451 |
| Lipoprotein subclasses | Cholesterol esters to total lipids ratio in chylomicrons and very small VLDL      | 0.88 | 0.67 - 1.14 | 0.91 | 0.74 - 1.11 | 0.86 | 0.74 - 0.99 | 0.87 | 0.78 - 0.97 | 0.01460 |
| Lipoprotein subclasses | Total cholesterol to total lipids ratio in chylomicrons and extremely large VLDL  | 1.11 | 0.82 - 1.51 | 1.19 | 0.94 - 1.51 | 1.28 | 1.08 - 1.51 | 1.22 | 1.08 - 1.39 | 0.00140 |
| Lipoprotein subclasses | Cholesterol esters to total lipids ratio in chylomicrons and extremely large VLDL | 1.04 | 0.79 - 1.38 | 1.22 | 0.96 - 1.56 | 1.21 | 1.02 - 1.44 | 1.18 | 1.04 - 1.33 | 0.00999 |
| Lipoprotein subclasses | Free cholesterol in chylomicrons and extremely large VLDL                         | 0.83 | 0.65 - 1.06 | 0.80 | 0.65 - 0.99 | 0.98 | 0.84 - 1.14 | 0.90 | 0.81 - 1.00 | 0.04830 |
| Lipoprotein subclasses | Total lipids in chylomicrons and extremely large VLDL                             | 0.79 | 0.62 - 1.00 | 0.82 | 0.68 - 0.99 | 0.95 | 0.82 - 1.11 | 0.88 | 0.79 - 0.98 | 0.01581 |
| Lipoprotein subclasses | Concentration of chylomicrons and extremely large VLDL particles                  | 0.78 | 0.61 - 1.00 | 0.82 | 0.68 - 0.99 | 0.95 | 0.82 - 1.10 | 0.87 | 0.79 - 0.97 | 0.01305 |
| Lipoprotein subclasses | Phospholipids in chylomicrons and extremely large VLDL                            | 0.82 | 0.64 - 1.04 | 0.81 | 0.67 - 0.99 | 0.95 | 0.82 - 1.11 | 0.88 | 0.79 - 0.98 | 0.02339 |
| Lipoprotein subclasses | Triglycerides in chylomicrons and extremely large VLDL                            | 0.78 | 0.61 - 0.99 | 0.80 | 0.66 - 0.98 | 0.94 | 0.81 - 1.09 | 0.87 | 0.78 - 0.96 | 0.00827 |
| Lipoprotein subclasses | Triglycerides to total lipids ratio in chylomicrons and extremely large VLDL      | 0.98 | 0.63 - 1.52 | 0.91 | 0.74 - 1.12 | 0.72 | 0.60 - 0.88 | 0.82 | 0.71 - 0.94 | 0.00336 |

---

**Table S2. Serum/plasma metabolites associated with moderate and above DR**

| Category of metabolites              | Name of metabolytes                               | Chinese |             | Malay |             | Indian |             | Pooled |             |           | After Bonferroni |
|--------------------------------------|---------------------------------------------------|---------|-------------|-------|-------------|--------|-------------|--------|-------------|-----------|------------------|
|                                      |                                                   | OR      | 95%CI       | OR    | 95%CI       | OR     | 95%CI       | OR     | 95%CI       | P - value | Correction       |
| Apolipoproteins                      | Apolipoprotein A-I                                | 0.74    | 0.52 - 1.05 | 0.63  | 0.49 - 0.82 | 0.88   | 0.70 - 1.09 | 0.76   | 0.65 - 0.88 | 0.00033   | select           |
| Apolipoproteins                      | Apolipoprotein B                                  | 0.90    | 0.63 - 1.28 | 0.71  | 0.56 - 0.90 | 0.96   | 0.78 - 1.19 | 0.85   | 0.73 - 0.98 | 0.02565   |                  |
| Ketone bodies                        | 3-hydroxybutyrate                                 | 1.91    | 1.30 - 2.81 | 1.16  | 0.92 - 1.48 | 1.10   | 0.87 - 1.38 | 1.22   | 1.05 - 1.42 | 0.00868   |                  |
| Fluid Balance                        | Creatinine                                        | 1.68    | 1.14 - 2.47 | 1.44  | 1.09 - 1.89 | 1.95   | 1.53 - 2.48 | 1.70   | 1.45 - 2.01 | 0.00000   | select           |
| Cholesterol                          | Esterified cholesterol                            | 0.96    | 0.67 - 1.36 | 0.60  | 0.47 - 0.77 | 0.90   | 0.74 - 1.11 | 0.79   | 0.69 - 0.92 | 0.00177   |                  |
| Fatty acids by saturation (%)        | Ratio of omega-3 fatty acids to total fatty acids | 1.00    | 0.71 - 1.43 | 1.24  | 0.97 - 1.57 | 1.27   | 1.02 - 1.59 | 1.21   | 1.04 - 1.40 | 0.01223   |                  |
| Fatty acids by saturation            | Omega-6 fatty acids                               | 0.97    | 0.67 - 1.39 | 0.67  | 0.53 - 0.85 | 0.89   | 0.72 - 1.10 | 0.81   | 0.70 - 0.94 | 0.00498   |                  |
| Cholesterol                          | Free cholesterol                                  | 0.96    | 0.67 - 1.36 | 0.73  | 0.58 - 0.92 | 0.96   | 0.78 - 1.18 | 0.87   | 0.75 - 1.00 | 0.04740   |                  |
| Glycolysis related metabolites       | Glucose                                           | 1.43    | 0.93 - 2.19 | 1.59  | 1.14 - 2.20 | 1.16   | 0.92 - 1.47 | 1.32   | 1.10 - 1.57 | 0.00211   |                  |
| Cholesterol                          | Total cholesterol in HDL2                         | 0.80    | 0.53 - 1.20 | 0.76  | 0.59 - 0.97 | 0.94   | 0.75 - 1.17 | 0.84   | 0.72 - 0.98 | 0.02798   |                  |
| Cholesterol                          | Total cholesterol in HDL3                         | 0.96    | 0.67 - 1.39 | 0.63  | 0.49 - 0.81 | 0.98   | 0.79 - 1.21 | 0.84   | 0.72 - 0.97 | 0.02123   |                  |
| Cholesterol                          | Total cholesterol in HDL                          | 0.80    | 0.56 - 1.13 | 0.74  | 0.58 - 0.95 | 0.90   | 0.73 - 1.12 | 0.82   | 0.71 - 0.95 | 0.00953   |                  |
| Lipoprotein subclasses & Cholesterol | Total cholesterol in IDL                          | 1.00    | 0.69 - 1.44 | 0.66  | 0.51 - 0.85 | 0.90   | 0.72 - 1.11 | 0.82   | 0.71 - 0.95 | 0.00843   |                  |
| Lipoprotein subclasses               | Total cholesterol to total lipids ratio in IDL    | 0.94    | 0.68 - 1.31 | 0.58  | 0.44 - 0.76 | 0.73   | 0.59 - 0.90 | 0.72   | 0.62 - 0.83 | 0.00001   | select           |
| Lipoprotein subclasses               | Cholesterol esters in IDL                         | 0.98    | 0.69 - 1.40 | 0.63  | 0.49 - 0.81 | 0.90   | 0.73 - 1.11 | 0.81   | 0.70 - 0.94 | 0.00429   |                  |

|                        |                                                                         |      |             |      |             |      |             |      |             |         |        |
|------------------------|-------------------------------------------------------------------------|------|-------------|------|-------------|------|-------------|------|-------------|---------|--------|
| Lipoprotein subclasses | Cholesterol esters to total lipids ratio in IDL                         | 0.80 | 0.57 - 1.13 | 0.57 | 0.43 - 0.74 | 0.72 | 0.58 - 0.89 | 0.68 | 0.59 - 0.79 | 0.00000 | select |
| Fatty acids            | 18:2, linoleic acid                                                     | 0.99 | 0.69 - 1.43 | 0.68 | 0.54 - 0.86 | 0.92 | 0.74 - 1.14 | 0.83 | 0.72 - 0.96 | 0.01136 |        |
| Lipoprotein subclasses | Total cholesterol in large VLDL                                         | 0.76 | 0.55 - 1.04 | 0.75 | 0.58 - 0.96 | 0.99 | 0.80 - 1.22 | 0.86 | 0.74 - 0.99 | 0.03280 |        |
| Lipoprotein subclasses | Cholesterol esters to total lipids ratio in chylomicrons and large VLDL | 1.31 | 0.89 - 1.92 | 1.57 | 1.22 - 2.03 | 1.25 | 1.02 - 1.54 | 1.36 | 1.17 - 1.58 | 0.00005 | select |
| Lipoprotein subclasses | Free cholesterol in large VLDL                                          | 0.75 | 0.55 - 1.03 | 0.71 | 0.54 - 0.93 | 0.99 | 0.81 - 1.23 | 0.85 | 0.73 - 0.98 | 0.02801 |        |
| Lipoprotein subclasses | Free cholesterol to total lipids ratio in chylomicrons and large VLDL   | 0.61 | 0.40 - 0.94 | 0.66 | 0.50 - 0.88 | 0.97 | 0.74 - 1.28 | 0.77 | 0.64 - 0.92 | 0.00390 |        |
| Lipoprotein subclasses | Total lipids in large VLDL                                              | 0.76 | 0.55 - 1.05 | 0.71 | 0.55 - 0.91 | 0.95 | 0.77 - 1.18 | 0.83 | 0.72 - 0.96 | 0.01039 |        |
| Lipoprotein subclasses | Concentration of large VLDL particles                                   | 0.76 | 0.55 - 1.06 | 0.71 | 0.55 - 0.91 | 0.95 | 0.77 - 1.17 | 0.83 | 0.72 - 0.95 | 0.00973 |        |
| Lipoprotein subclasses | Phospholipids in large VLDL                                             | 0.76 | 0.55 - 1.05 | 0.77 | 0.61 - 0.97 | 0.96 | 0.78 - 1.19 | 0.85 | 0.74 - 0.98 | 0.02092 |        |
| Lipoprotein subclasses | Triglycerides in large VLDL                                             | 0.76 | 0.55 - 1.06 | 0.70 | 0.54 - 0.90 | 0.95 | 0.77 - 1.17 | 0.82 | 0.71 - 0.95 | 0.00802 |        |
| Lipoprotein subclasses | Total cholesterol in medium HDL                                         | 0.83 | 0.59 - 1.18 | 0.72 | 0.56 - 0.92 | 0.93 | 0.74 - 1.15 | 0.83 | 0.71 - 0.96 | 0.01286 |        |
| Lipoprotein subclasses | Cholesterol esters in medium HDL                                        | 0.81 | 0.57 - 1.16 | 0.71 | 0.56 - 0.91 | 0.91 | 0.73 - 1.14 | 0.81 | 0.70 - 0.95 | 0.00712 |        |
| Lipoprotein subclasses | Total lipids in medium HDL                                              | 0.79 | 0.55 - 1.13 | 0.70 | 0.55 - 0.90 | 0.97 | 0.78 - 1.20 | 0.84 | 0.72 - 0.97 | 0.01633 |        |

|                              |    |                                                     |      |             |      |             |      |             |      |             |         |        |
|------------------------------|----|-----------------------------------------------------|------|-------------|------|-------------|------|-------------|------|-------------|---------|--------|
| Lipoprotein subclasses       |    | Concentration of medium HDL particles               | 0.77 | 0.54 - 1.11 | 0.70 | 0.55 - 0.90 | 0.97 | 0.79 - 1.20 | 0.84 | 0.72 - 0.97 | 0.01624 |        |
| Lipoprotein subclasses       |    | Phospholipids in medium HDL                         | 0.74 | 0.53 - 1.04 | 0.71 | 0.56 - 0.91 | 0.99 | 0.80 - 1.23 | 0.84 | 0.73 - 0.97 | 0.01901 |        |
| Lipoprotein subclasses       |    | Phospholipids in medium LDL                         | 0.95 | 0.66 - 1.37 | 0.66 | 0.52 - 0.83 | 0.90 | 0.73 - 1.12 | 0.81 | 0.70 - 0.94 | 0.00411 |        |
| Lipoprotein subclasses       |    | Triglycerides in medium VLDL                        | 0.81 | 0.58 - 1.13 | 0.79 | 0.63 - 1.00 | 0.95 | 0.76 - 1.17 | 0.86 | 0.74 - 0.99 | 0.03507 |        |
| Glycerides and phospholipids |    | Phosphatidylcholine and other cholines              | 0.81 | 0.57 - 1.15 | 0.67 | 0.53 - 0.86 | 0.92 | 0.74 - 1.14 | 0.80 | 0.69 - 0.93 | 0.00302 |        |
| Fatty acids saturation       | by | Polyunsaturated fatty acids                         | 0.95 | 0.66 - 1.36 | 0.69 | 0.55 - 0.88 | 0.94 | 0.77 - 1.16 | 0.85 | 0.73 - 0.98 | 0.02284 |        |
| Cholesterol                  |    | Remnant cholesterol (non-HDL, non-LDL -cholesterol) | 0.89 | 0.63 - 1.27 | 0.72 | 0.57 - 0.91 | 0.99 | 0.80 - 1.23 | 0.86 | 0.75 - 1.00 | 0.04373 |        |
| Cholesterol                  |    | Serum total cholesterol                             | 0.94 | 0.66 - 1.33 | 0.66 | 0.52 - 0.83 | 0.92 | 0.75 - 1.13 | 0.82 | 0.71 - 0.94 | 0.00568 |        |
| Fatty acids saturation       | by | Saturated fatty acids                               | 0.83 | 0.58 - 1.19 | 0.65 | 0.51 - 0.83 | 0.90 | 0.73 - 1.12 | 0.79 | 0.68 - 0.92 | 0.00182 |        |
| Fatty acids saturation (%)   | by | Ratio of saturated fatty acids to total fatty acids | 0.69 | 0.47 - 1.00 | 0.81 | 0.64 - 1.03 | 0.74 | 0.59 - 0.91 | 0.76 | 0.65 - 0.88 | 0.00019 | select |
| Lipoprotein subclasses       |    | Free cholesterol in small HDL                       | 0.80 | 0.56 - 1.15 | 0.76 | 0.60 - 0.96 | 0.93 | 0.75 - 1.16 | 0.84 | 0.72 - 0.97 | 0.01718 |        |
| Lipoprotein subclasses       |    | Total lipids in small HDL                           | 0.94 | 0.68 - 1.31 | 0.64 | 0.50 - 0.82 | 0.95 | 0.77 - 1.17 | 0.83 | 0.72 - 0.96 | 0.01057 |        |
| Lipoprotein subclasses       |    | Concentration of small HDL particles                | 0.93 | 0.67 - 1.29 | 0.66 | 0.52 - 0.86 | 0.95 | 0.77 - 1.18 | 0.84 | 0.73 - 0.97 | 0.01975 |        |



|                                           |                                                            |      |             |      |             |      |             |      |             |         |        |
|-------------------------------------------|------------------------------------------------------------|------|-------------|------|-------------|------|-------------|------|-------------|---------|--------|
| Lipoprotein subclasses                    | Phospholipids in small HDL                                 | 0.77 | 0.53 - 1.11 | 0.78 | 0.62 - 0.99 | 0.95 | 0.76 - 1.18 | 0.85 | 0.74 - 0.99 | 0.03276 |        |
| Lipoprotein subclasses                    | Phospholipids in small LDL                                 | 0.90 | 0.63 - 1.29 | 0.52 | 0.39 - 0.69 | 0.85 | 0.69 - 1.05 | 0.74 | 0.64 - 0.87 | 0.00013 | select |
| Glycerides and phospholipids              | Sphingomyelins                                             | 0.98 | 0.69 - 1.39 | 0.66 | 0.51 - 0.84 | 0.80 | 0.64 - 1.00 | 0.77 | 0.67 - 0.89 | 0.00058 | select |
| Glycerides and phospholipids              | Total cholines                                             | 0.84 | 0.59 - 1.20 | 0.69 | 0.54 - 0.88 | 0.92 | 0.74 - 1.14 | 0.82 | 0.71 - 0.94 | 0.00649 |        |
| Total fatty acids and saturation measures | Total fatty acids                                          | 0.87 | 0.61 - 1.25 | 0.67 | 0.53 - 0.86 | 0.95 | 0.77 - 1.18 | 0.83 | 0.72 - 0.96 | 0.01125 |        |
| Glycerides and phospholipids              | Total phosphoglycerides                                    | 0.79 | 0.55 - 1.12 | 0.65 | 0.51 - 0.83 | 0.92 | 0.74 - 1.14 | 0.79 | 0.68 - 0.92 | 0.00172 |        |
| Aromatic amino acids                      | Tyrosine                                                   | 0.57 | 0.40 - 0.82 | 0.67 | 0.53 - 0.85 | 0.76 | 0.62 - 0.93 | 0.69 | 0.60 - 0.80 | 0.00000 | select |
| Total fatty acids and saturation measures | Estimated degree of unsaturation                           | 1.14 | 0.80- 1.62  | 1.38 | 1.10 - 1.74 | 1.23 | 0.98 - 1.54 | 1.27 | 1.10 - 1.47 | 0.00138 |        |
| Lipoprotein subclasses                    | Total cholesterol in very large HDL                        | 0.89 | 0.65 - 1.22 | 0.75 | 0.59 - 0.96 | 0.82 | 0.68 - 0.99 | 0.81 | 0.71 - 0.93 | 0.00273 |        |
| Lipoprotein subclasses                    | Total cholesterol to total lipids ratio in very large HDL  | 0.78 | 0.53 - 1.15 | 0.73 | 0.57 - 0.93 | 0.76 | 0.60 - 0.98 | 0.75 | 0.64 - 0.88 | 0.00044 | select |
| Lipoprotein subclasses                    | Cholesterol esters in very large HDL                       | 0.90 | 0.65 - 1.23 | 0.73 | 0.56 - 0.94 | 0.81 | 0.67 - 0.98 | 0.80 | 0.70 - 0.92 | 0.00177 |        |
| Lipoprotein subclasses                    | Cholesterol esters to total lipids ratio in very large HDL | 0.85 | 0.58 - 1.26 | 0.74 | 0.58 - 0.95 | 0.76 | 0.59 - 0.98 | 0.77 | 0.65 - 0.90 | 0.00125 |        |

|                        |                                                                                   |      |             |      |             |      |             |      |             |         |        |
|------------------------|-----------------------------------------------------------------------------------|------|-------------|------|-------------|------|-------------|------|-------------|---------|--------|
| Lipoprotein subclasses | Free cholesterol to total lipids ratio in very large HDL                          | 0.70 | 0.45 - 1.08 | 0.75 | 0.58 - 0.97 | 0.81 | 0.64 - 1.03 | 0.77 | 0.66 - 0.91 | 0.00161 |        |
| Lipoprotein subclasses | Phospholipids to total lipids ratio in very large HDL                             | 1.13 | 0.69 - 1.86 | 1.31 | 0.97 - 1.76 | 1.48 | 1.06 - 2.08 | 1.34 | 1.09 - 1.64 | 0.00537 |        |
| Lipoprotein subclasses | Cholesterol esters to total lipids ratio in chylomicrons and very large VLDL      | 1.46 | 0.91 - 2.33 | 1.72 | 1.30 - 2.28 | 1.38 | 1.03 - 1.85 | 1.54 | 1.28 - 1.85 | 0.00001 | select |
| Lipoprotein subclasses | Total lipids in very large VLDL                                                   | 0.74 | 0.54 - 1.00 | 0.68 | 0.53 - 0.88 | 0.95 | 0.77 - 1.16 | 0.81 | 0.70 - 0.94 | 0.00416 |        |
| Lipoprotein subclasses | Concentration of very large VLDL particles                                        | 0.74 | 0.54 - 1.00 | 0.68 | 0.52 - 0.88 | 0.95 | 0.77 - 1.16 | 0.81 | 0.70 - 0.93 | 0.00393 |        |
| Lipoprotein subclasses | Phospholipids in very large VLDL                                                  | 0.75 | 0.55 - 1.03 | 0.66 | 0.51 - 0.86 | 0.97 | 0.79 - 1.19 | 0.82 | 0.71 - 0.94 | 0.00531 |        |
| Lipoprotein subclasses | Phospholipids to total lipids ratio in chylomicrons and very large VLDL           | 0.54 | 0.31 - 0.96 | 0.70 | 0.52 - 0.95 | 0.96 | 0.70 - 1.32 | 0.77 | 0.63 - 0.95 | 0.01471 |        |
| Lipoprotein subclasses | Triglycerides in very large VLDL                                                  | 0.74 | 0.54 - 1.00 | 0.68 | 0.52 - 0.91 | 0.90 | 0.73 - 1.10 | 0.80 | 0.69 - 0.92 | 0.00231 |        |
| Lipoprotein subclasses | Total cholesterol to total lipids ratio in chylomicrons and extremely large VLDL  | 1.19 | 0.76 - 1.86 | 1.42 | 1.05 - 1.92 | 1.54 | 1.24 - 1.93 | 1.45 | 1.23 - 1.71 | 0.00001 | select |
| Lipoprotein subclasses | Cholesterol esters to total lipids ratio in chylomicrons and extremely large VLDL | 1.00 | 0.68 - 1.49 | 1.56 | 1.14 - 2.13 | 1.52 | 1.20 - 1.92 | 1.42 | 1.20 - 1.68 | 0.00005 | select |
| Lipoprotein subclasses | Free cholesterol in chylomicrons and extremely large VLDL                         | 0.75 | 0.55 - 1.02 | 0.73 | 0.57 - 0.93 | 0.94 | 0.77 - 1.16 | 0.83 | 0.72 - 0.95 | 0.00803 |        |
| Lipoprotein subclasses | Total lipids in chylomicrons and extremely large VLDL                             | 0.74 | 0.54 - 1.02 | 0.74 | 0.59 - 0.93 | 0.94 | 0.76 - 1.15 | 0.83 | 0.72 - 0.95 | 0.00664 |        |
| Lipoprotein subclasses | Concentration of chylomicrons and extremely large VLDL particles                  | 0.74 | 0.54 - 1.02 | 0.74 | 0.58 - 0.93 | 0.93 | 0.76 - 1.14 | 0.82 | 0.71 - 0.94 | 0.00545 |        |

|                        |                                                                              |      |             |      |             |      |             |      |             |         |
|------------------------|------------------------------------------------------------------------------|------|-------------|------|-------------|------|-------------|------|-------------|---------|
| Lipoprotein subclasses | Phospholipids in chylomicrons and extremely large VLDL                       | 0.75 | 0.55 - 1.03 | 0.73 | 0.57 - 0.93 | 0.92 | 0.75 - 1.13 | 0.82 | 0.71 - 0.94 | 0.00569 |
| Lipoprotein subclasses | Phospholipids to total lipids ratio in chylomicrons and extremely large VLDL | 0.53 | 0.30 - 0.94 | 0.84 | 0.61 - 1.15 | 0.93 | 0.68 - 1.26 | 0.83 | 0.67 - 1.02 | 0.06963 |
| Lipoprotein subclasses | Triglycerides in chylomicrons and extremely large VLDL                       | 0.74 | 0.54 - 1.02 | 0.71 | 0.56 - 0.91 | 0.91 | 0.74 - 1.11 | 0.81 | 0.70 - 0.93 | 0.00268 |

---

**Table S3. Serum/plasma metabolites associated with VTDR**

| Category of metabolites                               | Name of metabolites                                                     | Chinese |             | Malay |             | Indian |             | Pooled |             |           | After Bonferroni Correction |
|-------------------------------------------------------|-------------------------------------------------------------------------|---------|-------------|-------|-------------|--------|-------------|--------|-------------|-----------|-----------------------------|
|                                                       |                                                                         | OR      | 95%CI       | OR    | 95%CI       | OR     | 95%CI       | OR     | 95%CI       | P - value |                             |
| Apolipoproteins                                       | Apolipoprotein A-I                                                      | 0.55    | 0.34 - 0.88 | 0.82  | 0.61 - 1.11 | 0.97   | 0.76 - 1.23 | 0.85   | 0.71 - 1.01 | 0.06079   |                             |
| Ketone bodies                                         | 3-hydroxybutyrate                                                       | 2.76    | 1.67 - 4.56 | 1.29  | 0.97 - 1.71 | 1.16   | 0.90 - 1.49 | 1.34   | 1.13 - 1.60 | 0.00097   | select                      |
| Fluid Balance                                         | Creatinine                                                              | 1.79    | 1.08 - 2.97 | 1.79  | 1.30 - 2.47 | 2.14   | 1.65 - 2.76 | 1.96   | 1.63 - 2.37 | 0.00000   | select                      |
| Glycolysis related metabolites                        | Glucose                                                                 | 1.16    | 0.68 - 1.97 | 1.85  | 1.21 - 2.83 | 1.07   | 0.83 - 1.39 | 1.23   | 1.00 - 1.51 | 0.04508   |                             |
| Cholesterol                                           | Total cholesterol in HDL2                                               | 0.59    | 0.35 - 1.00 | 0.74  | 0.55 - 1.00 | 0.90   | 0.70 - 1.15 | 0.80   | 0.67 - 0.95 | 0.01367   |                             |
| Cholesterol                                           | Total cholesterol in HDL                                                | 0.60    | 0.38 - 0.93 | 0.77  | 0.57 - 1.04 | 0.93   | 0.73 - 1.18 | 0.82   | 0.69 - 0.97 | 0.02154   |                             |
| Lipoprotein subclasses                                | Total cholesterol to total lipids ratio in IDL                          | 0.73    | 0.49 - 1.09 | 0.69  | 0.50 - 0.96 | 0.89   | 0.70 - 1.12 | 0.80   | 0.67 - 0.95 | 0.01045   |                             |
| Lipoprotein subclasses                                | Cholesterol esters to total lipids ratio in IDL                         | 0.71    | 0.46 - 1.09 | 0.66  | 0.48 - 0.90 | 0.84   | 0.66 - 1.06 | 0.76   | 0.64 - 0.90 | 0.00157   | select                      |
| Glycerides and phospholipids & Lipoprotein subclasses | Triglycerides in IDL                                                    | 1.11    | 0.71 - 1.74 | 1.53  | 1.15 - 2.04 | 1.32   | 1.04 - 1.68 | 1.36   | 1.14 - 1.61 | 0.00044   | select                      |
| Lipoprotein subclasses                                | Triglycerides in large LDL                                              | 1.02    | 0.65 - 1.60 | 1.47  | 1.10 - 1.95 | 1.30   | 1.00 - 1.68 | 1.31   | 1.10 - 1.56 | 0.00281   |                             |
| Lipoprotein subclasses                                | Triglycerides to total lipids ratio in large LDL                        | 1.31    | 0.84 - 2.04 | 1.41  | 1.05 - 1.90 | 1.16   | 0.92 - 1.48 | 1.26   | 1.06 - 1.50 | 0.00744   |                             |
| Lipoprotein subclasses                                | Cholesterol esters to total lipids ratio in chylomicrons and large VLDL | 1.21    | 0.74 - 1.97 | 1.69  | 1.23 - 2.32 | 1.11   | 0.88 - 1.39 | 1.27   | 1.07 - 1.51 | 0.00682   |                             |

|                               |                                                                     |      |             |      |             |      |             |      |             |         |        |
|-------------------------------|---------------------------------------------------------------------|------|-------------|------|-------------|------|-------------|------|-------------|---------|--------|
| Lipoprotein subclasses        | Total cholesterol in medium HDL                                     | 0.66 | 0.43 - 1.03 | 0.63 | 0.47 - 0.85 | 0.95 | 0.75 - 1.22 | 0.78 | 0.66 - 0.93 | 0.00624 |        |
| Lipoprotein subclasses        | Total cholesterol to total lipids ratio in medium HDL               | 0.84 | 0.55 - 1.29 | 0.68 | 0.50 - 0.92 | 0.88 | 0.69 - 1.14 | 0.80 | 0.67 - 0.96 | 0.01373 |        |
| Lipoprotein subclasses        | Cholesterol esters in medium HDL                                    | 0.64 | 0.41 - 1.01 | 0.62 | 0.46 - 0.83 | 0.94 | 0.74 - 1.21 | 0.77 | 0.64 - 0.91 | 0.00303 |        |
| Lipoprotein subclasses        | Cholesterol esters to total lipids ratio in medium HDL              | 0.86 | 0.56 - 1.33 | 0.66 | 0.49 - 0.89 | 0.84 | 0.65 - 1.09 | 0.78 | 0.65 - 0.93 | 0.00585 |        |
| Lipoprotein subclasses        | Free cholesterol in medium HDL                                      | 0.68 | 0.42 - 1.09 | 0.69 | 0.51 - 0.93 | 0.97 | 0.76 - 1.25 | 0.82 | 0.69 - 0.98 | 0.02895 |        |
| Lipoprotein subclasses        | Total lipids in medium HDL                                          | 0.61 | 0.38 - 0.97 | 0.63 | 0.46 - 0.85 | 1.00 | 0.79 - 1.26 | 0.80 | 0.67 - 0.95 | 0.01233 |        |
| Lipoprotein subclasses        | Triglycerides to total lipids ratio in medium HDL                   | 1.04 | 0.68 - 1.60 | 1.41 | 1.07 - 1.86 | 1.14 | 0.90 - 1.44 | 1.21 | 1.03 - 1.43 | 0.02253 |        |
| Lipoprotein subclasses        | Triglycerides in medium LDL                                         | 1.02 | 0.65 - 1.62 | 1.38 | 1.02 - 1.88 | 1.29 | 1.01 - 1.66 | 1.28 | 1.07 - 1.53 | 0.00738 |        |
| Lipoprotein subclasses        | Triglycerides to total lipids ratio in medium LDL                   | 1.28 | 0.84 - 1.97 | 1.34 | 1.00 - 1.79 | 1.15 | 0.92 - 1.45 | 1.23 | 1.04 - 1.45 | 0.01336 |        |
| Lipoprotein subclasses        | Phospholipids to total lipids ratio in chylomicrons and medium VLDL | 1.16 | 0.77 - 1.74 | 1.37 | 1.04 - 1.81 | 1.17 | 0.89 - 1.54 | 1.24 | 1.04 - 1.48 | 0.01485 |        |
| Fatty acids by saturation (%) | Ratio of saturated fatty acids to total fatty acids                 | 0.70 | 0.42 - 1.16 | 0.73 | 0.54 - 0.98 | 0.71 | 0.56 - 0.90 | 0.71 | 0.60 - 0.85 | 0.00015 | select |
| Lipoprotein subclasses        | Free cholesterol in small HDL                                       | 0.69 | 0.44 - 1.09 | 0.70 | 0.53 - 0.93 | 0.95 | 0.74 - 1.21 | 0.81 | 0.68 - 0.96 | 0.01749 |        |
| Lipoprotein subclasses        | Phospholipids in small HDL                                          | 0.71 | 0.44 - 1.13 | 0.66 | 0.50 - 0.89 | 0.97 | 0.76 - 1.23 | 0.81 | 0.68 - 0.96 | 0.01808 |        |

|                        |          |                                                                                   |      |             |      |             |      |             |      |             |         |        |
|------------------------|----------|-----------------------------------------------------------------------------------|------|-------------|------|-------------|------|-------------|------|-------------|---------|--------|
| Aromatic acids         | amino    | Tyrosine                                                                          | 0.54 | 0.34 - 0.85 | 0.74 | 0.55 - 0.99 | 0.72 | 0.58 - 0.90 | 0.70 | 0.59 - 0.83 | 0.00002 | select |
| Lipoprotein size       | particle | Mean diameter for VLDL particles                                                  | 0.90 | 0.59 - 1.37 | 0.72 | 0.54 - 0.97 | 0.92 | 0.73 - 1.16 | 0.85 | 0.72 - 1.00 | 0.05348 |        |
| Lipoprotein subclasses |          | Triglycerides in very small VLDL                                                  | 1.06 | 0.69 - 1.63 | 1.39 | 1.05 - 1.85 | 1.22 | 0.97 - 1.55 | 1.25 | 1.06 - 1.48 | 0.00852 |        |
| Lipoprotein subclasses |          | Total cholesterol to total lipids ratio in chylomicrons and extremely large VLDL  | 1.41 | 0.80 - 2.48 | 1.74 | 1.19 - 2.53 | 1.35 | 1.06 - 1.72 | 1.45 | 1.20 - 1.76 | 0.00015 | select |
| Lipoprotein subclasses |          | Cholesterol esters to total lipids ratio in chylomicrons and extremely large VLDL | 1.32 | 0.78 - 2.21 | 1.86 | 1.25 - 2.75 | 1.36 | 1.05 - 1.77 | 1.47 | 1.20 - 1.79 | 0.00016 | select |
| Lipoprotein subclasses |          | Triglycerides to total lipids ratio in chylomicrons and extremely large VLDL      | 0.69 | 0.30 - 1.59 | 0.58 | 0.41 - 0.82 | 0.74 | 0.57 - 0.97 | 0.68 | 0.55 - 0.83 | 0.00019 | select |

---

**Table S4. Urinary metabolites associated with any DR**

| Category of metabolites        | Name of metabolytes    | Chinese |             | Indian |             | Pooled |             | P - value | After Bonferroni Correction |
|--------------------------------|------------------------|---------|-------------|--------|-------------|--------|-------------|-----------|-----------------------------|
|                                |                        | OR      | 95%CI       | OR     | 95%CI       | OR     | 95%CI       |           |                             |
| Glycolysis related metabolites | Citrate                | 1.28    | 1.01 - 1.63 | 1.33   | 1.08 - 1.64 | 1.31   | 1.12 - 1.53 | 0.00073   | select                      |
| Miscellaneous                  | Ethanolamine           | 1.35    | 1.04 - 1.77 | 1.28   | 1.09 - 1.49 | 1.30   | 1.13 - 1.48 | 0.00015   | select                      |
| Miscellaneous                  | Formate                | 1.53    | 1.08 - 2.18 | 1.30   | 1.09 - 1.54 | 1.34   | 1.15 - 1.57 | 0.00023   | select                      |
| Other amino acids              | Glutamine              | 1.33    | 1.01 - 1.74 | 1.16   | 1.00 - 1.36 | 1.20   | 1.05 - 1.38 | 0.00702   | select                      |
| Miscellaneous                  | Hypoxanthine           | 1.34    | 1.02 - 1.74 | 1.25   | 1.06 - 1.47 | 1.27   | 1.11 - 1.46 | 0.00065   | select                      |
| Other amino acids              | Taurine                | 1.15    | 0.85 - 1.56 | 1.21   | 1.01 - 1.44 | 1.19   | 1.02 - 1.39 | 0.02418   |                             |
| Microbial metabolism           | Trimethylamine-N-oxide | 0.84    | 0.64 - 1.11 | 0.85   | 0.73 - 0.99 | 0.85   | 0.74 - 0.97 | 0.01390   |                             |

**Table S5. Urinary metabolites associated with moderate and above DR**

| Category of metabolites        | Name of metabolytes  | Chinese |             | Indian |             | Pooled |             | P - value | After Bonferroni Correction |
|--------------------------------|----------------------|---------|-------------|--------|-------------|--------|-------------|-----------|-----------------------------|
|                                |                      | OR      | 95% CI      | OR     | 95% CI      | OR     | 95% CI      |           |                             |
| Other amino acids              | Alanine              | 1.32    | 0.90 - 1.93 | 1.53   | 1.22 - 1.92 | 1.47   | 1.21 - 1.79 | 0.00010   | select                      |
| Pyrimidine metabolism          | 3-Hydroxyisobutyrate | 1.29    | 0.91 - 1.82 | 1.55   | 1.25 - 1.92 | 1.48   | 1.23 - 1.77 | 0.00003   | select                      |
| Miscellaneous                  | 3-Hydroxyisovalerate | 1.39    | 0.86 - 2.22 | 1.46   | 1.22 - 1.76 | 1.45   | 1.23 - 1.73 | 0.00002   | select                      |
| Glycolysis related metabolites | Citrate              | 1.17    | 0.84 - 1.62 | 1.99   | 1.50 - 2.63 | 1.59   | 1.29 - 1.97 | 0.00002   | select                      |
| Miscellaneous                  | Ethanolamine         | 1.46    | 1.00 - 2.12 | 1.95   | 1.52 - 2.49 | 1.78   | 1.45 - 2.19 | 0.00000   | select                      |
| Miscellaneous                  | Formate              | 1.56    | 0.97 - 2.51 | 1.84   | 1.43 - 2.36 | 1.78   | 1.43 - 2.21 | 0.00000   | select                      |
| Other amino acids              | Glutamine            | 1.22    | 0.85 - 1.77 | 1.31   | 1.02 - 1.67 | 1.28   | 1.05 - 1.57 | 0.01718   |                             |
| Miscellaneous                  | Glycolic acid        | 1.07    | 0.75 - 1.53 | 1.44   | 1.15 - 1.79 | 1.33   | 1.10 - 1.60 | 0.00333   | select                      |
| Miscellaneous                  | Hypoxanthine         | 1.43    | 0.99 - 2.07 | 1.67   | 1.28 - 2.18 | 1.59   | 1.28 - 1.97 | 0.00003   | select                      |
| Branched-chain amino acids     | Leucine              | 1.15    | 0.79 - 1.69 | 1.32   | 1.04 - 1.67 | 1.27   | 1.04 - 1.55 | 0.01915   |                             |
| Pyrimidine metabolism          | Uracil               | 1.08    | 0.74 - 1.57 | 1.36   | 1.08 - 1.72 | 1.28   | 1.05 - 1.56 | 0.01584   |                             |
| Branched-chain amino acids     | Valine               | 1.20    | 0.84 - 1.7  | 1.28   | 1.04 - 1.58 | 1.26   | 1.05 - 1.51 | 0.01261   |                             |



**Table S6. Urinary metabolites associated with VTDR**

| Category of metabolites        | Name of metabolytes  | Chinese |             | Indian |             | Pooled |             |           | After<br>Bonferroni<br>Correction |
|--------------------------------|----------------------|---------|-------------|--------|-------------|--------|-------------|-----------|-----------------------------------|
|                                |                      | OR      | 95%CI       | OR     | 95%CI       | OR     | 95%CI       | P - value |                                   |
| Other amino acids              | Alanine              | 1.01    | 0.60 - 1.68 | 1.41   | 1.10 - 1.81 | 1.32   | 1.06 - 1.66 | 0.01433   |                                   |
| Miscellaneous                  | 3-Hydroxyisobutyrate | 1.13    | 0.70 - 1.82 | 1.44   | 1.14 - 1.82 | 1.38   | 1.11 - 1.70 | 0.00295   | select                            |
| Miscellaneous                  | 3-Hydroxyisovalerate | 1.39    | 0.76 - 2.55 | 1.48   | 1.22 - 1.80 | 1.47   | 1.22 - 1.77 | 0.00004   | select                            |
| Glycolysis related metabolites | Citrate              | 1.05    | 0.65 - 1.69 | 1.91   | 1.41 - 2.57 | 1.61   | 1.25 - 2.08 | 0.00023   | select                            |
| Miscellaneous                  | Ethanolamine         | 1.59    | 0.96 - 2.65 | 1.80   | 1.37 - 2.36 | 1.75   | 1.38 - 2.22 | 0.00001   | select                            |
| Miscellaneous                  | Formate              | 1.17    | 0.61 - 2.22 | 1.81   | 1.38 - 2.37 | 1.70   | 1.32 - 2.18 | 0.00003   | select                            |
| Miscellaneous                  | Hypoxanthine         | 1.37    | 0.85 - 2.21 | 2.00   | 1.45 - 2.75 | 1.78   | 1.37 - 2.32 | 0.00002   | select                            |
| Branched-chain amino acids     | Leucine              | 1.13    | 0.68 - 1.87 | 1.33   | 1.02 - 1.73 | 1.28   | 1.01 - 1.62 | 0.03892   |                                   |
| Dietary metabolites            | 3-Methylhistidine    | 0.65    | 0.44 - 0.96 | 0.88   | 0.70 - 1.11 | 0.81   | 0.66 - 0.99 | 0.04364   |                                   |
| Pyrimidine metabolism          | Uracil               | 1.05    | 0.63 - 1.74 | 1.54   | 1.17 - 2.02 | 1.41   | 1.11 - 1.79 | 0.00463   | select                            |

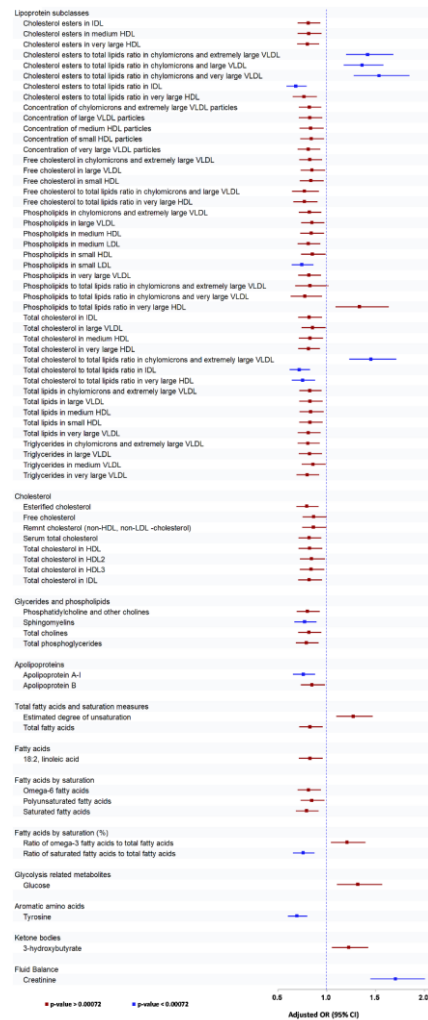

**Figure S1.** Association between serum/plasma metabolites and moderate/above diabetic retinopathy in Chinese, Indians and Malay cohorts.

OR estimate corresponds to per SD ↑ in serum metabolites  
OR estimates adjusted for age, sex, systolic BP, duration of diabetes and HbA1c%

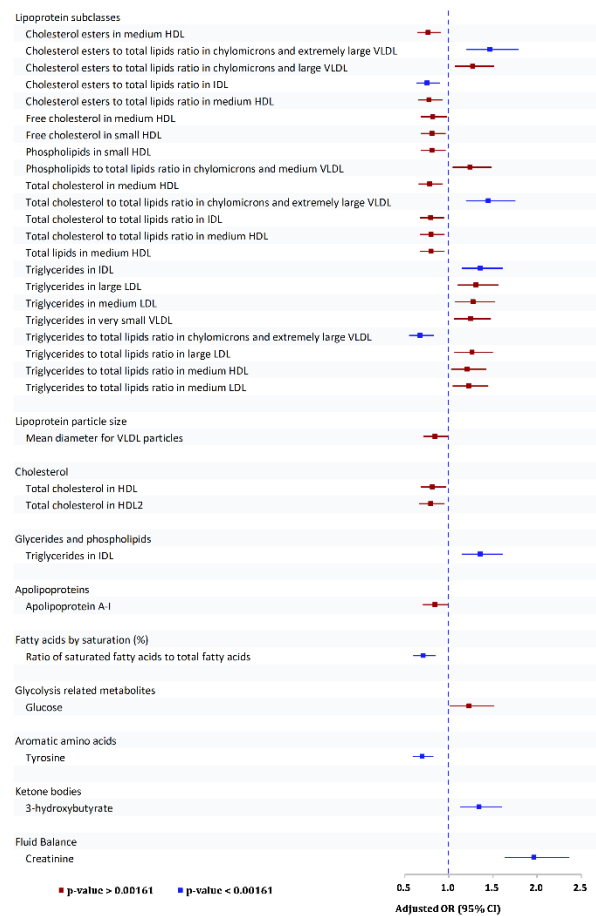

**Figure S2.** Association between serum/plasma metabolites and vision-threatening diabetic retinopathy in Chinese, Indians and Malay cohorts.

OR estimate corresponds to per SD ↑ in serum metabolites, and per SD ↓ in urine and metabolites  
OR estimates adjusted for age, sex, systolic BP, duration of diabetes and HbA1c%

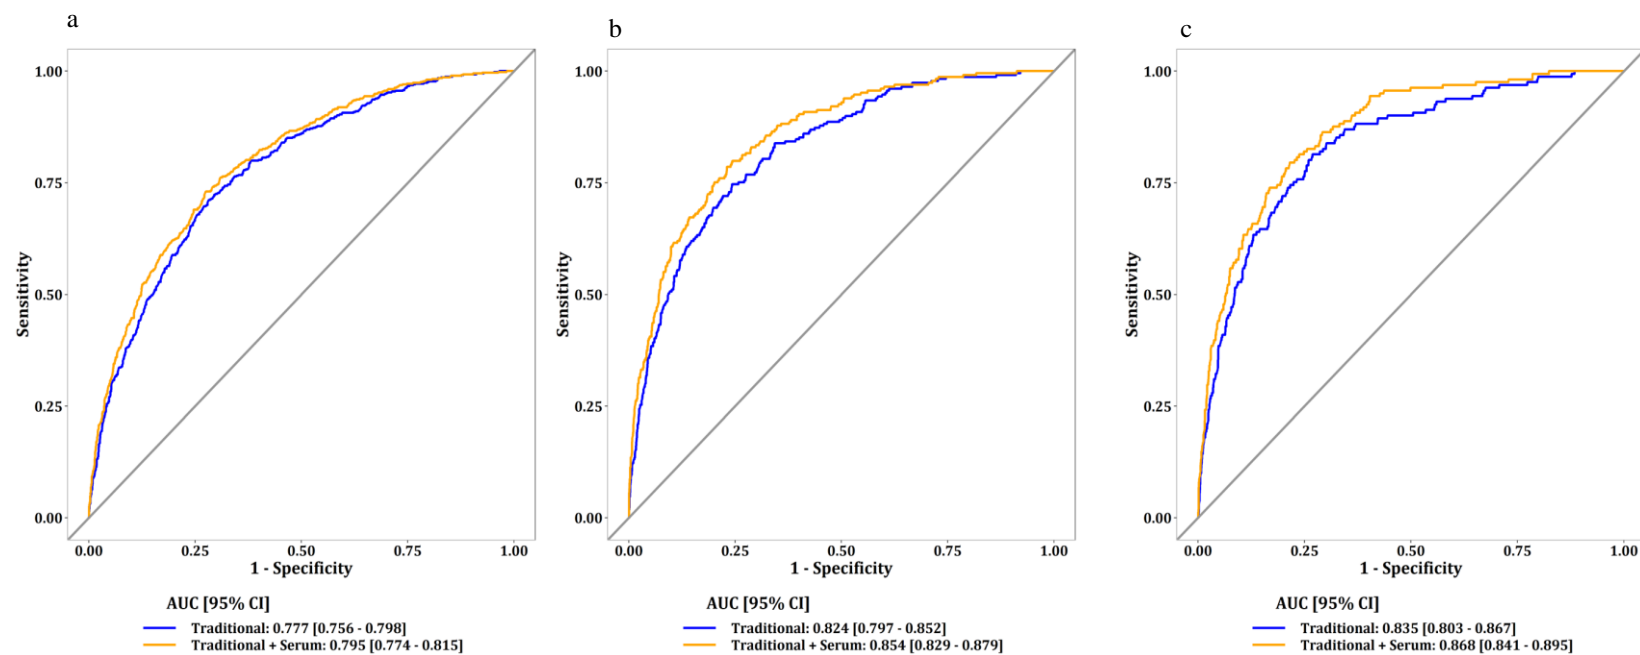

**Figure S3.** ROC curves – metabolites and a) any DR b) Moderate and above DR c) VTDR.
